# Supplementary material for: Polymethylmethacrylate coating on aligned carbon nanotube–silicon solar cells for performance improvement
Source: Royal Society of Chemistry journal article supplement (doi:10.1039/c3ta14625a), 2013-12-18
Supplement: c3ta14625a.pdf [file c3ta14625a.pdf]

Supporting information for

## Polymethylmethacrylate Coating on Aligned Carbon Nanotube-Silicon Solar Cells for Performance Improvement

Ru Li<sup>a,b\*</sup>, Jiangtao Di<sup>b</sup>, Zhenzhong Yong<sup>b</sup>, Baoquan Sun<sup>c</sup>

<sup>a</sup> University of Chinese Academy of Sciences, Beijing 100049, China;

<sup>b</sup> Key Laboratory of Nano-Devices and Applications, Suzhou Institute of Nano-Tech and Nano-Bionics, Chinese Academy of Sciences, Suzhou 215123, China. E-mail: rli2011@sinano.ac.cn.

<sup>c</sup> Jiangsu Key Laboratory for Carbon-Based Functional Materials & Devices, Institute of Functional Nano & Soft Materials (FUNSOM), Soochow University, 199 Ren'ai Road, Suzhou, 215123, China;

1: Average thickness of CNT film drawn from double-walled spinnable CNT array

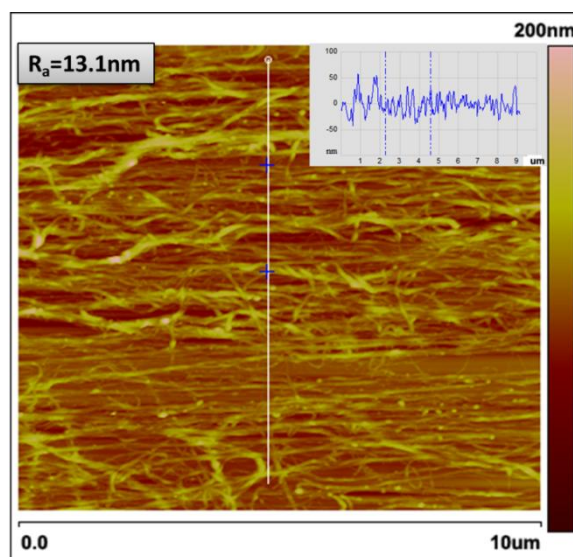

Fig. S1 Roughness and cross section height of CNT film from spinnable CNT array.

2: Transparency of CNT film drawn from double-walled spinnable CNT array

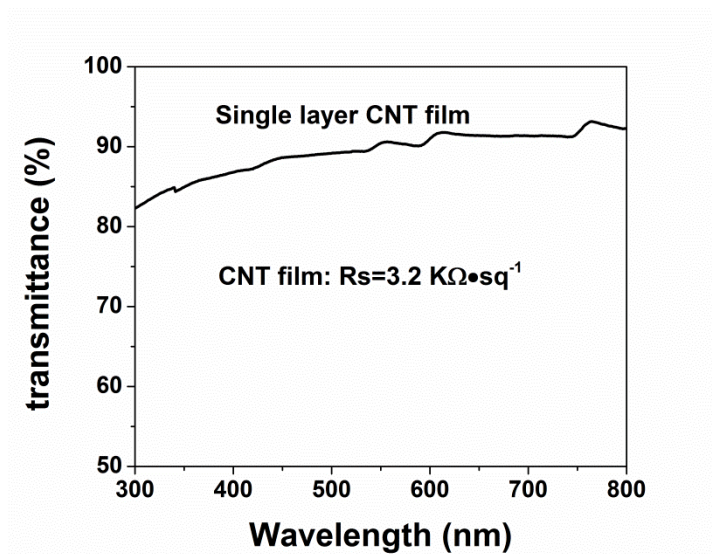

Fig. S2 Transmittance and square resistance of CNT film drawn from spinnable CNT array

3: **Table S1** Thickness of PMMA film from different concentration

| Concentration (wt. %) | 2%   | 2.5% | 3%    | 3.5%  | 4%    |
|-----------------------|------|------|-------|-------|-------|
| Film thickness (nm)   | 84.7 | 112  | 142.2 | 178.5 | 236.7 |

4: Thickness of PMMA-CNT film from 2.5 wt. % PMMA concentration

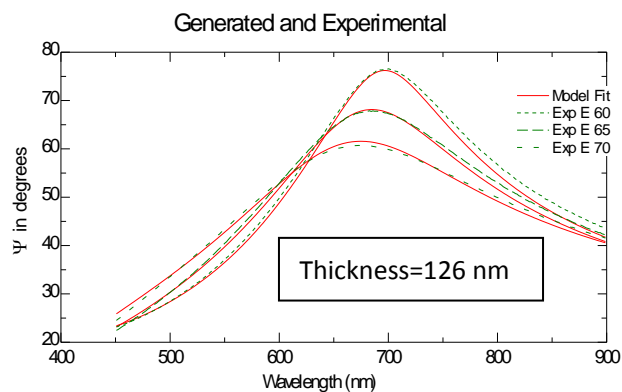

Fig. S3 Thickness of PMMA-CNT film from 2.5 wt. % PMMA concentration

5: Stability of PMMA-CNT-Si solar cell treated with HNO<sub>3</sub>

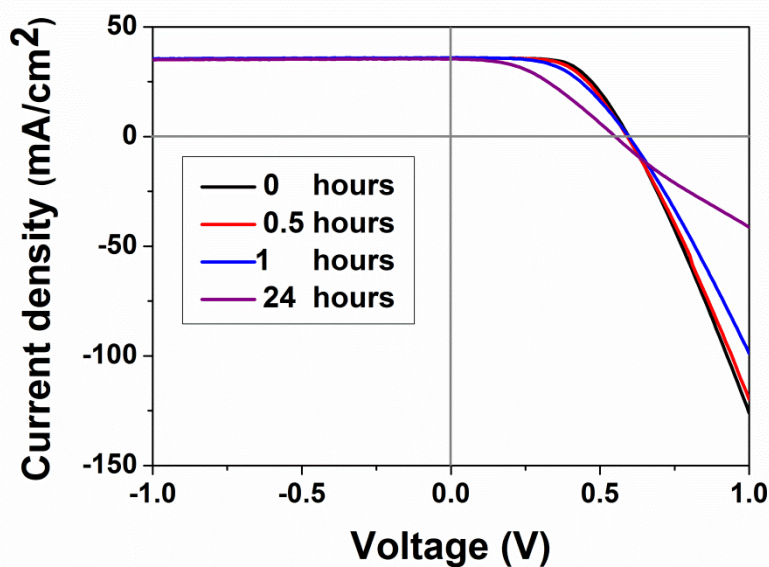

Fig. S4 Decrease of *FF* storage in air condition

6: **Table S2** Photovoltaic properties of 5 solar cells fabricated in a batch after doped with HNO<sub>3</sub>.

| Sample | $J_{sc}/\text{mA}\cdot\text{cm}^{-2}$ | $V_{oc}/\text{V}$ | $FF/\%$ | $PCE/\%$ |
|--------|---------------------------------------|-------------------|---------|----------|
| 1      | 35.6                                  | 0.60              | 61.5    | 13.1     |
| 2      | 34.7                                  | 0.59              | 60.2    | 12.3     |
| 3      | 34.3                                  | 0.60              | 59.8    | 12.3     |
| 4      | 32.1                                  | 0.59              | 58.1    | 11       |
| 5      | 33.7                                  | 0.59              | 58.7    | 11.7     |

$$\overline{PCE} = 12.08, \sigma = 0.78$$

7: Conductivity of CNT film on glass before and after PMMA coating

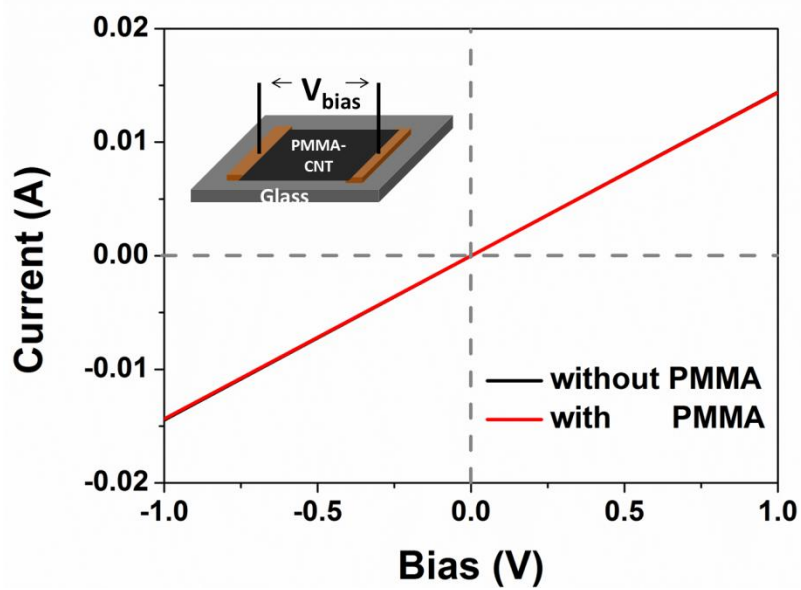

Fig. S5 Conductivity of CNT film on glass before and after PMMA coating
